# Supplementary material for: Three-Dimensional Heads-Up vs. Standard Operating Microscope for Cataract Surgery: A Systematic Review and Meta-Analysis
Source: MDPI journal article supplement (doi:10.3390/diagnostics12092100), 2022-08-30
Supplement: s1 [file s1]

## Supplementary Material S1: Detailed Search Strategy

Free Text

Initial search performed on 16 June 2022

Search updated on 26 June 2022

No limits applied

| # | Search Term                                                          | No. Results |
|---|----------------------------------------------------------------------|-------------|
| 1 | 3D OR (three AND dimension*) OR (3-dimension*) OR (three-dimension*) | 510,770     |
| 2 | Head*-up OR (head* AND up)                                           | 100,307     |
| 3 | “Artevo” OR “Ngenuity” OR “TrueVision”                               | 50          |
| 4 | 1 OR 2 OR 3                                                          | 608,253     |
| 7 | “Cataract OR (Cataract AND surgery) OR (Cataract AND extraction)     | 84,972      |
| 7 | 6 AND 7                                                              | 821         |

## Embase

Free Text

Initial search performed on 16 June 2022

Search updated on 26 June 2022

[embase]/lim, no other limits applied

Mapping options enabled:

- map to preferred term in Emtree
- search also as free text in all fields
- explode using narrower Emtree terms

search as broadly as possible

| # | Search Term                                                                                                                                                                                                      | No. of Results |
|---|------------------------------------------------------------------------------------------------------------------------------------------------------------------------------------------------------------------|----------------|
| 1 | 3D OR (three AND dimension*) OR (3-dimension*) OR (three-dimension*) OR heads-up OR (head AND up) OR “Artevo” OR “Ngenuity” OR “TrueVision AND “Cataract OR (Cataract AND surgery) OR (Cataract AND extraction)” | 1231           |

## Scopus

Free Text

Initial search performed on 16 June 2022

Search updated on 26 June 2022

| # | Search Term                                                                                                                                                                                                                                                                                              | No. of Results |
|---|----------------------------------------------------------------------------------------------------------------------------------------------------------------------------------------------------------------------------------------------------------------------------------------------------------|----------------|
| 1 | ( TITLE-ABS-KEY ( 3d OR ( three AND dimension* ) OR ( 3-dimension* ) OR ( three- AND dimension* ) ) OR TITLE-ABS-KEY ( heads-up OR ( head AND up ) ) OR TITLE-ABS-KEY ( "Artevo" OR "Ngenuity" OR "TrueVision" ) ) AND ( TITLE-ABS-KEY ( cataract OR cataract AND surgery OR cataract AND extraction ) ) | 317            |
