# Supplementary material for: Three-Dimensional Heads-Up vs. Standard Operating Microscope for Cataract Surgery: A Systematic Review and Meta-Analysis
Source: MDPI journal article supplement (doi:10.3390/diagnostics12092100), 2022-08-30
Supplement: s1 [file s1]

**Table S1: Newcastle–Ottawa Scale for Critical Appraisal of Case-Control Studies**

|                        | Selection                |                                 | Selection controls | Definitios of controls | Comparability                       | Exposure                  |                                                     | Non-Response rate | Total |
|------------------------|--------------------------|---------------------------------|--------------------|------------------------|-------------------------------------|---------------------------|-----------------------------------------------------|-------------------|-------|
|                        | Adequate case definition | Representativeness of the cases |                    |                        | Comparability of cases and controls | Ascertainment of exposure | Same method of ascertainment for cases and controls |                   |       |
| Source                 |                          |                                 |                    |                        |                                     |                           |                                                     |                   |       |
| Weinstock et al., 2019 | +1 (a)                   | +1 (a)                          | +1 (a)             | +1 (a)                 | +1 (a)                              | +1 (a)                    | +1 (a)                                              | +1 (a)            | 8/10  |
| Berquet et al., 2020   | +1 (a)                   | +1 (a)                          | +1 (a)             | +1 (a)                 | +1 (a)                              | +1 (a)                    | +1 (a)                                              | +1 (a)            | 8/10  |
| Rosenberg et al., 2020 | +1 (a)                   | +1 (a)                          | +1 (a)             | +1 (a)                 | +1 (a)                              | +1 (a)                    | +1 (a)                                              | +1 (a)            | 8/10  |
| Bedar et al., 2021     | +1 (a)                   | +1 (a)                          | +1 (a)             | +1 (a)                 | +1 (a)                              | +1 (a)                    | +1 (a)                                              | +1 (a)            | 8/10  |
| Del Turco et al., 2021 | +1 (a)                   | +1 (a)                          | +1 (a)             | +1 (a)                 | +1 (a)                              | 0 (c)                     | +1 (a)                                              | +1 (a)            | 7/10  |
| Nariai et al., 2022    | +1 (a)                   | +1 (a)                          | +1 (a)             | +1 (a)                 | +1 (a)                              | +1 (a)                    | +1 (a)                                              | +1 (a)            | 8/10  |

Selection: 1) Is the case definition adequate? a) yes, with independent validation, b) yes, eg record linkage or based on self reports, c) no description 2) Representativeness of the cases: a) consecutive or obviously representative series of cases, b) potential for selection biases or not stated3) Selection of Controls: a) community controls, b) hospital controls, c) no description, 4) Definition of Controls a) no history of disease (endpoint); b) no description of source; Comparability: 1) Comparability of cases and controls on the basis of the design or analysis: a) study controls for (Select the most important factor.), b) study controls for any additional factor; Exposure: 1) Ascertainment of exposure a) secure record (eg surgical records), b) structured interview where blind to case/control status, c) interview not blinded to case/control status, d) written self report or medical record only e) no description; 2) Same method of ascertainment for cases and controls; a) yes, b) no; 3) Non-Response rate: a) same rate for both groups; b) non respondents described; c) rate different and no designation.

**Table S2: Risk of bias for randomized controlled trial studies using Cochrane Collaboration's Tool**

|                        | Selection Bias             |                        | Performance Bias                       | Detection Bias                 | Attrition Bias                    | Reporting Bias      | Other      |
|------------------------|----------------------------|------------------------|----------------------------------------|--------------------------------|-----------------------------------|---------------------|------------|
|                        | Random sequence generation | Allocation concealment | Blinding of participants and personnel | Blinding of outcome assessment | Incomplete outcome data addressed | Selective reporting | Other bias |
| Source                 |                            |                        |                                        |                                |                                   |                     |            |
| Qian et al., 2019      | Unclear                    | Unclear                | High                                   | High                           | Unclear                           | Low                 | Low        |
| Bawankule et al., 2020 | Unclear                    | Unclear                | High                                   | High                           | Unclear                           | Low                 | Low        |
| Wang et al., 2021      | Low                        | Low                    | High                                   | High                           | Unclear                           | Low                 | Low        |

**Table S3: Risk of bias non- randomized controlled trial studies using Methodological Index for Non-randomized Studies (MINORS) Scale**

| Study               | A clearly stated aim | Inclusion of consecutive patients | Prospective collection of data | Endpoints appropriate to the aim of the study | Unbiased assessment of the study endpoint | Follow-up period appropriate to the aim of the study | Loss to follow up less than 5% | Prospective calculation of the study size | An adequate control group | Contemporary groups | Baseline equivalence of groups | Adequate statistical analyses | Total |
|---------------------|----------------------|-----------------------------------|--------------------------------|-----------------------------------------------|-------------------------------------------|------------------------------------------------------|--------------------------------|-------------------------------------------|---------------------------|---------------------|--------------------------------|-------------------------------|-------|
| Kelkar et al., 2021 | 2                    | 2                                 | 2                              | 2                                             | 2                                         | 2                                                    | 2                              | 0                                         | 2                         | 2                   | 2                              | 2                             | 22    |
| Kelkar et al., 2022 | 2                    | 2                                 | 2                              | 2                                             | 2                                         | 2                                                    | 2                              | 0                                         | 2                         | 2                   | 2                              | 2                             | 22    |

The items are scored 0 (not reported), 1 (reported but inadequate) or 2 (reported and adequate).

Table S4: GRADE assessment

| Certainty assessment                       |             |                                          |              |                            |                           |                          |                               | Patients (n) |         | Effect                         | Certainty   |
|--------------------------------------------|-------------|------------------------------------------|--------------|----------------------------|---------------------------|--------------------------|-------------------------------|--------------|---------|--------------------------------|-------------|
| Outcome                                    | Studies (n) | Study design                             | Risk of bias | Inconsistency <sup>a</sup> | Indirectness <sup>d</sup> | Imprecision <sup>c</sup> | Publication bias <sup>b</sup> | Group 1      | Group 2 | Relative MD or OR (95% CI)     |             |
| Duration of surgical time                  | 9           | observational studies<br>RCT and Non-RCT | not serious  | serious                    | not serious               | Not serious              | Undetected                    | 3151         | 2354    | <b>0.17</b><br>(-0.43 to 0.76) | ⊕⊕○○<br>Low |
| Postoperative best-corrected visual acuity | 5           | observational studies<br>RCT and Non-RCT | not serious  | Not serious                | not serious               | Not serious              | Undetected                    | 408          | 613     | <b>0.01</b><br>(-0.01 to 0.02) | ⊕⊕○○<br>Low |
| Intraoperative complications               | 9           | observational studies<br>RCT and Non-RCT | not serious  | Not serious                | not serious               | Not serious              | Undetected                    | 4705         | 3904    | <b>1.00</b><br>(1.00 to 1.01)  | ⊕⊕○○<br>Low |

**CI:** Confidence interval; **MD:** Mean difference; **OR:** Odds ratio; <sup>a</sup> Substantial heterogeneity I<sup>2</sup> > 60% (serious) or >90% (very serious); <sup>b</sup> Strongly suspected if funnel plot suggestive of publication bias or lack of small studies and negative effects; <sup>c</sup> serious if total number of events is less than 300, CIs overlap or non clinically significant effect; <sup>d</sup> Serious indirectness refer to variation of outcome measure or definition across studies
